# Supplementary material for: Substituting fossil-based with bio-based chemicals: the case of limonene as a greener pore expander for micellar templated silica
Source: Royal Society of Chemistry journal article supplement (doi:10.1039/d3su00068k), 2023-01-01
Supplement: d3su00068k1.pdf [file d3su00068k1.pdf]

## Supplementary Information

### **Substituting fossil-based with bio-based chemicals: The case of limonene as a greener pore expander for micellar templated silica**

Umair Sultan<sup>a,b</sup>, Katrin Städtke<sup>a</sup>, Andreas Göpfert<sup>a</sup>, Daniel Lemmen<sup>a</sup>, Ezzeldin Metwali<sup>c</sup>, Santanu Maiti<sup>c</sup>, Carola Schlumberger<sup>d</sup>, Tadahiro Yokosawa<sup>e</sup>, Benjamin Apeleo Zubiri<sup>e</sup>, Erdmann Spiecker<sup>e</sup>, Nicolas Vogel<sup>b</sup>, Tobias Unruh<sup>c</sup>, Matthias Thommes<sup>d</sup>, Alexandra Inayat<sup>a</sup>

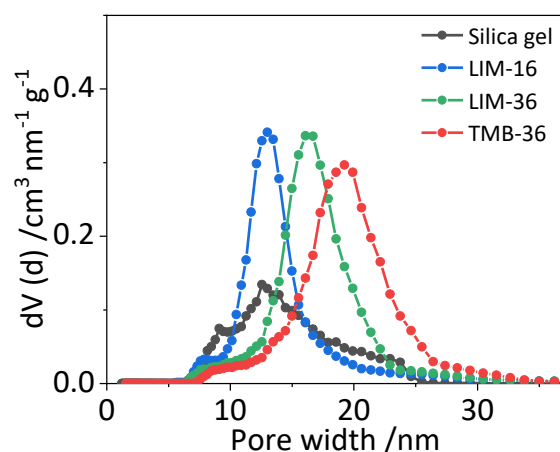

**Figure S1.** Comparison of the pore size distributions of templated silica (LIM-16, LIM-36 and TMB-36) and commercial silica gel to visualise the need for template and expander to obtain high pore volumes and narrower pore size distribution in the size range of 10 to 25 nm.

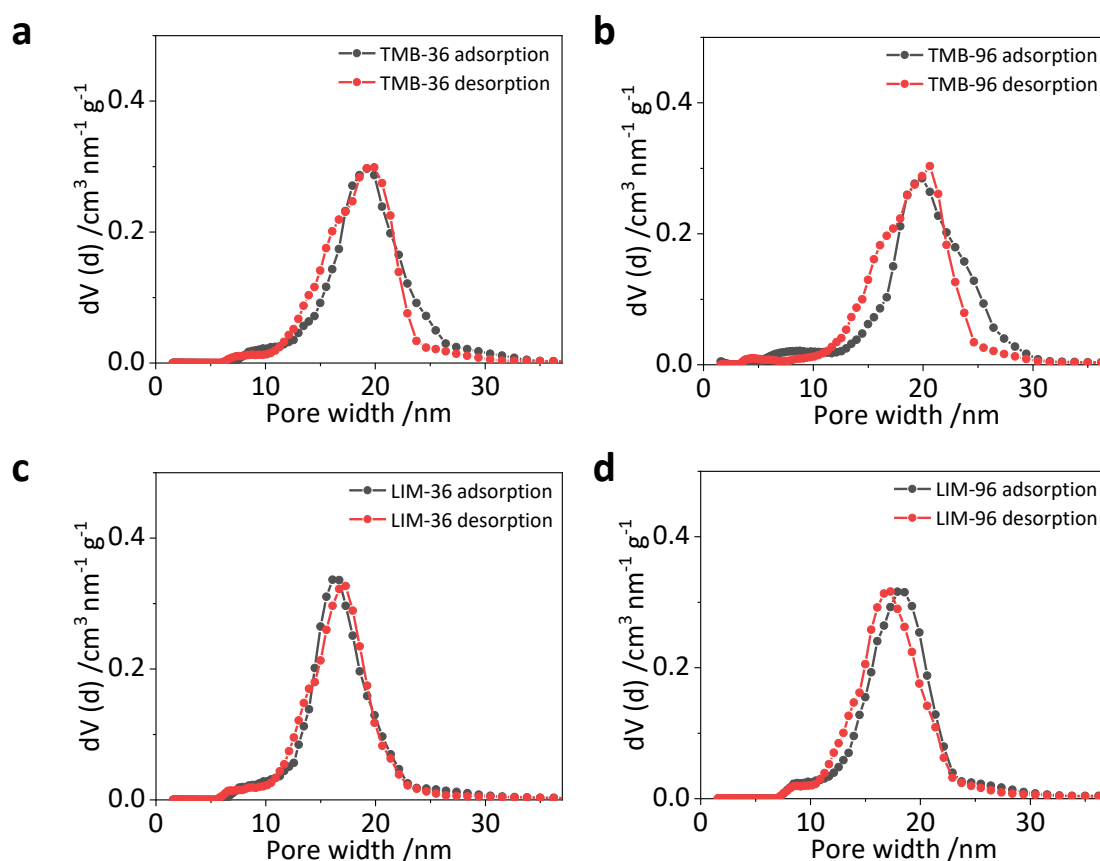

**Figure S2.** Pore size distributions from nitrogen physisorption for samples synthesised with low (36) and high (96) expander/P123 molar ratio using TMB (top row) and limonene (LIM, bottom row). The comparison of pore size distributions calculated from the adsorption and desorption branches of the isotherms shows very similar mode pore diameters. This indicates that the majority of the pores are not restricted by narrower pore openings and are freely accessible.

**Table S1. Micropore volumes (from t-plot) for all the mesoporous silica samples**

| <b>Sample</b>     | <b>Micropore volume<br/>(cm<sup>3</sup> g<sup>-1</sup>)</b> |
|-------------------|-------------------------------------------------------------|
| <b>silica gel</b> | 0.001                                                       |
| <b>SBA-15</b>     | 0.008                                                       |
| <b>TMB-4</b>      | 0.008                                                       |
| <b>TMB-16</b>     | 0.060                                                       |
| <b>TMB-36</b>     | 0.020                                                       |
| <b>TMB 56</b>     | 0.003                                                       |
| <b>TMB-76</b>     | 0.010                                                       |
| <b>TMB-96</b>     | 0.030                                                       |
| <b>LIM-4</b>      | 0.040                                                       |
| <b>LIM-16</b>     | 0.007                                                       |
| <b>LIM-36</b>     | 0.020                                                       |
| <b>LIM-56</b>     | 0.030                                                       |
| <b>LIM-76</b>     | 0.020                                                       |
| <b>LIM-96</b>     | 0.020                                                       |

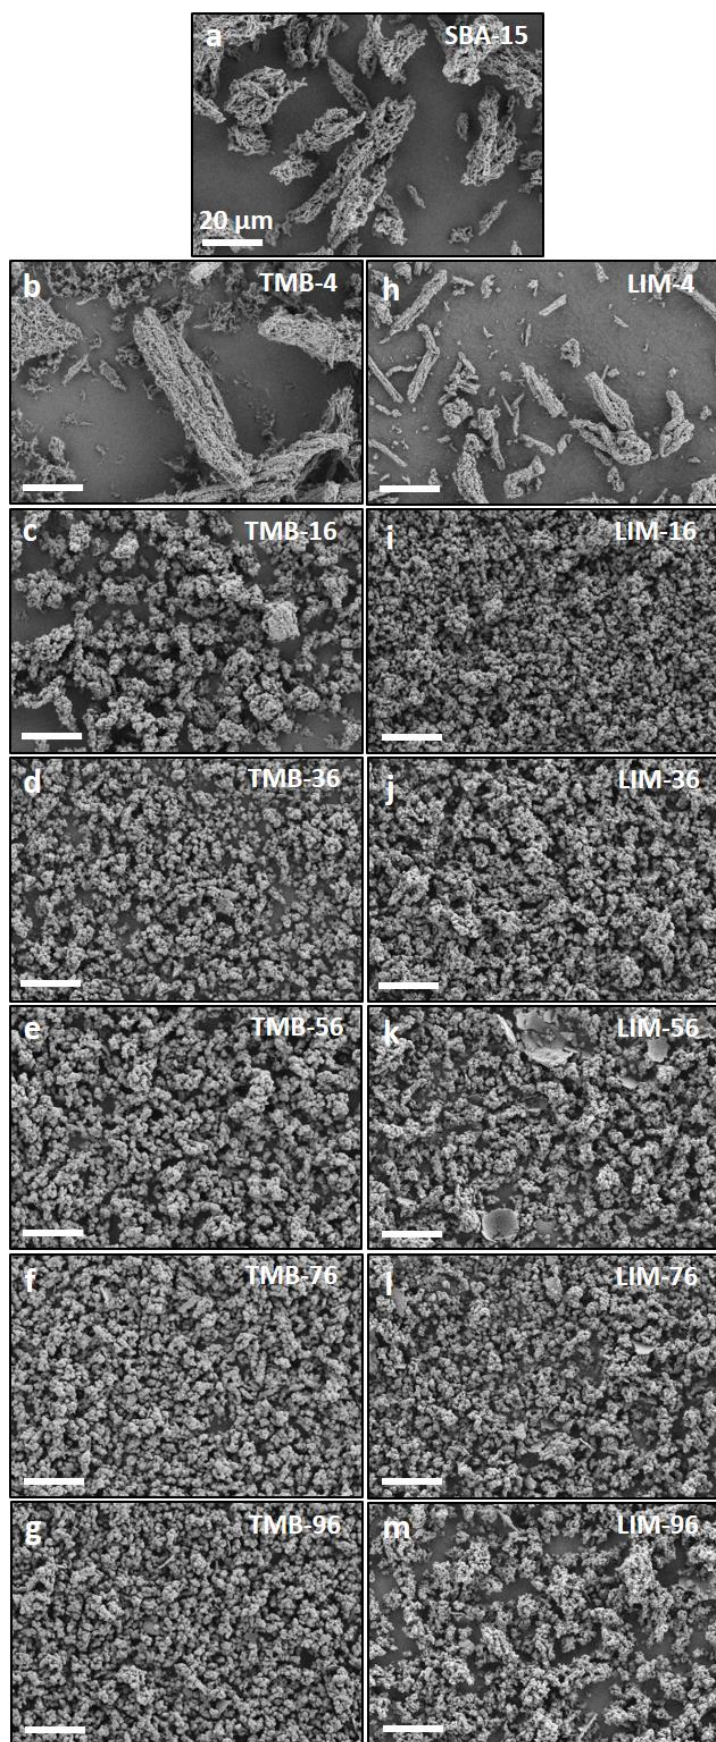

**Figure S3.** Low magnification overview SEM images of mesoporous silica materials with increasing expander to P123 molar ratio using TMB (left column) and limonene (right column) as expander molecule. All scale bars are 20  $\mu\text{m}$ .

**Table S2. Elementary or process flows, calculated quantities for the production of 1 t expander molecule and specification of the input data taken from the ecoinvent database.**

| Elementary or process flow                                              | Quantity for the production of 1t expander molecule | Ecoinvent process / category                                                                                                                                                                                                                |
|-------------------------------------------------------------------------|-----------------------------------------------------|---------------------------------------------------------------------------------------------------------------------------------------------------------------------------------------------------------------------------------------------|
| <b>Inputs Route TMB</b>                                                 |                                                     |                                                                                                                                                                                                                                             |
| <i>Self-condensation (implemented data(from simulation))</i>            |                                                     |                                                                                                                                                                                                                                             |
| Acetone, liquid*                                                        | 3076.2 kg                                           | phenol production, from cumene   acetone, liquid   Cutoff, U - RER                                                                                                                                                                          |
| Silica sand (Nb cut-off)                                                | 38.7 kg                                             | silica sand production   silica sand   Cutoff, U - DE                                                                                                                                                                                       |
| Electricity, medium voltage<br><br>scenario: gate-gate renewable energy | 25163.2 MJ                                          | electricity voltage transformation from high to medium voltage   electricity, medium voltage   Cutoff, U –DE<br><br>market for electricity, medium voltage, label-certified   electricity, medium voltage, label-certified   Cutoff, U - CH |
| transport of 1.5 t crude oil from Russia to Germany (1224 km pipeline)  | 1836 t*km                                           | transport, pipeline, offshore, petroleum                                                                                                                                                                                                    |
| transport of 2 t hard coal from Russia to Germany (1300 km)             | 2600 t*km                                           | transport, freight train (for hard coal)                                                                                                                                                                                                    |
| <b>Outputs Route TMB</b>                                                |                                                     |                                                                                                                                                                                                                                             |
| TMB                                                                     | 1000.0 kg                                           | None (new implemented)                                                                                                                                                                                                                      |
| Acetic acid                                                             | 2.1 kg                                              | Elementary flow> Emission to air/ unspecified                                                                                                                                                                                               |
| Hydrocarbons, aliphatic, alkenes, C12, internal                         | 11.7 kg                                             | Elementary flow> Emission to air/ unspecified                                                                                                                                                                                               |
| Isobutene                                                               | 11.2 kg                                             | Elementary flow> Emission to air/ high population density                                                                                                                                                                                   |
| Trimethylbenzene                                                        | 16.2 kg                                             | Elementary flow> Emission to air/ high population density                                                                                                                                                                                   |
| Acetone (recycling)                                                     | 585. kg                                             | Elementary flow> Emission to air/ unspecified                                                                                                                                                                                               |
| Catalyst (ideal recycling)                                              | 35.0 kg                                             | none                                                                                                                                                                                                                                        |
| Waste water, average                                                    | 687.5 kg                                            | Water supply> Sewerage                                                                                                                                                                                                                      |
| <b>Inputs Route Limonene</b>                                            |                                                     |                                                                                                                                                                                                                                             |
| <i>Orange juice production</i>                                          |                                                     |                                                                                                                                                                                                                                             |
| Orange, fresh grade                                                     | 571.9 t                                             | orange production, fresh grade   orange, fresh grade   Cutoff, U - ES                                                                                                                                                                       |
| Nitric acid                                                             | 0.2 kg                                              | nitric acid production, product in 50% solution state   nitric acid, without water, in 50% solution state   Cutoff, U - RER w/o RU                                                                                                          |

|                                                                             |             |                                                                                                                                                           |
|-----------------------------------------------------------------------------|-------------|-----------------------------------------------------------------------------------------------------------------------------------------------------------|
| Soda ash, dense                                                             | 6.0 kg      | market for soda ash, dense   soda ash, dense   Cutoff, U - GLO                                                                                            |
| heat, district or industrial, natural gas                                   | 11.9 MJ     | heat and power co-generation, natural gas, 1MW electrical, lean burn   heat, district or industrial, natural gas   Cutoff, U - Europe without Switzerland |
| electricity, medium voltage                                                 | 115.1 MWh   | electricity voltage transformation from high to medium voltage   electricity, medium voltage   Cutoff, U - ES                                             |
| <i>Steam distillation</i>                                                   |             |                                                                                                                                                           |
| Orange peel                                                                 | 192.3 t     | Orangepeel_Allo5                                                                                                                                          |
| Water, deionised                                                            | 14.8 t      | water production, deionised   water, deionised   Cutoff, U - Europe without Switzerland                                                                   |
| electricity, medium voltage                                                 | 35944.4 MJ  | electricity voltage transformation from high to medium voltage   electricity, medium voltage   Cutoff, U –DE                                              |
| scenario: gate-gate renewable energy                                        |             | market for electricity, medium voltage, label-certified   electricity, medium voltage, label-certified   Cutoff, U - CH                                   |
| transport of 192 t dry orange peel from Spain to Germany by lorry (1300 km) | 249600 t*km | transport, freight, lorry EURO5                                                                                                                           |
| <b>Outputs Route Limonene</b>                                               |             |                                                                                                                                                           |
| <i>Orange juice production</i>                                              |             |                                                                                                                                                           |
| Orange peel                                                                 | 192.3 t     | none                                                                                                                                                      |
| Orange juice (allocation)                                                   | 611.0 t     | none                                                                                                                                                      |
| Waste water (orange juice production)                                       | 723.1 t     | Water supply> Sewerage                                                                                                                                    |
| <i>Steam distillation (implemented data from simulation)</i>                |             |                                                                                                                                                           |
| Limonene                                                                    | 1000.0 kg   | none                                                                                                                                                      |
| By-products                                                                 | 20.0 t      | Manufacturing> Manufacture of sugar                                                                                                                       |
| Compost                                                                     | 171.3 t     | Agriculture, forestry and fishing>Support activities for crop production                                                                                  |
| Waste water                                                                 | 148 t       | Water supply> Sewerage                                                                                                                                    |

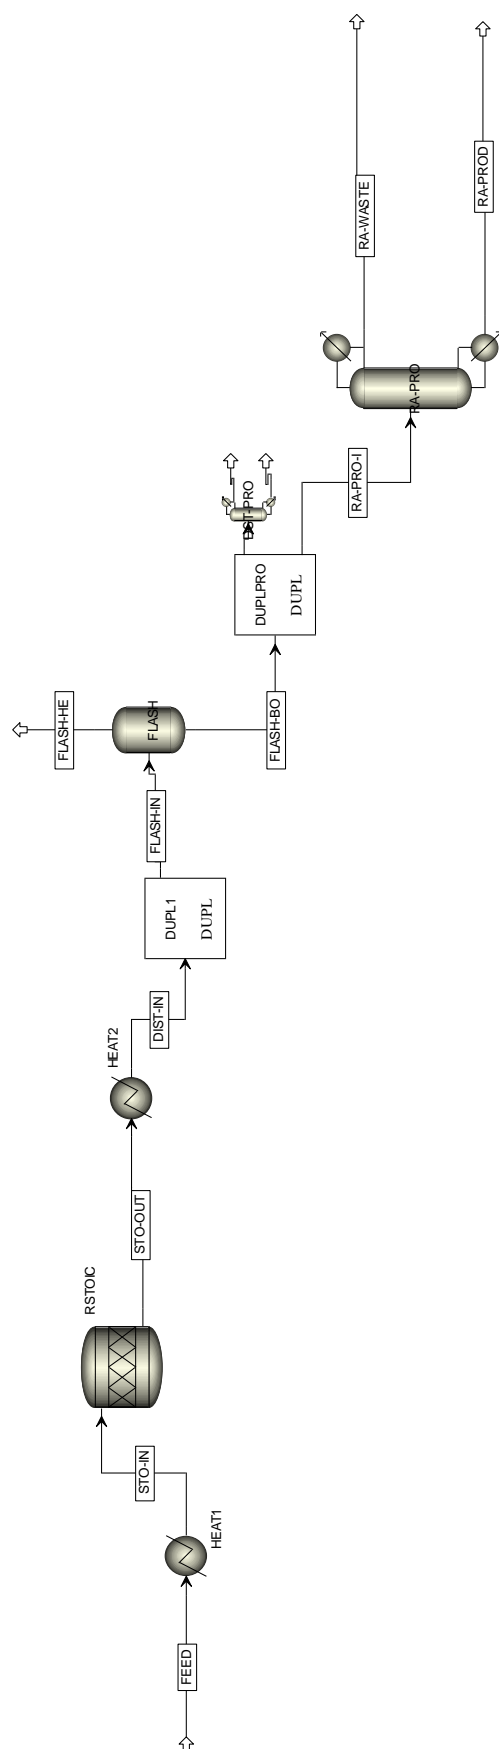

**Figure S4. Process of TMB production via self-condensation of acetone: AspenPlus flow sheet of the simulation using the NRTL model.**

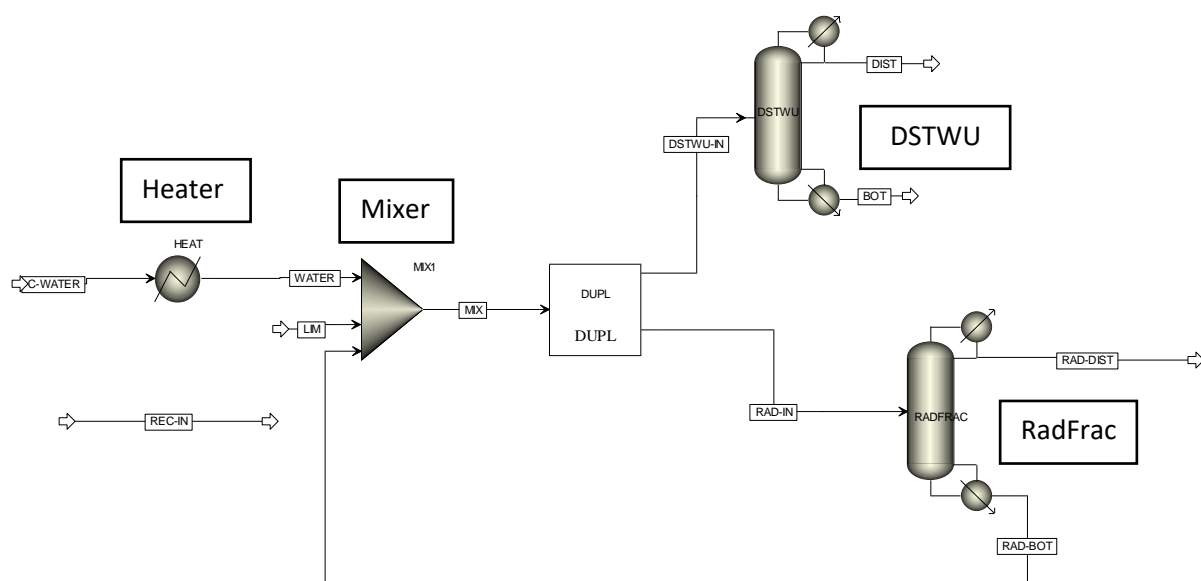

**Figure S5. Process of limonene production from orange peels: AspenPlus flow sheet of the simulation using the NRTL model.**

**Table S3: Inputs for the self-condensation of acetone (production of TMB) and steam distillation of orange peels (production of limonene) for the AspenPlus simulation.**

| <b>INPUTS TMB</b> |                                                                                          |        |         |                                                               |
|-------------------|------------------------------------------------------------------------------------------|--------|---------|---------------------------------------------------------------|
|                   |                                                                                          | T / °C | p / bar | Comment                                                       |
| PROPERTY METHOD   | NRTL                                                                                     |        |         |                                                               |
| FEED-Stream       | Acetone                                                                                  | 25     | 1       | 0.068 kmol.h <sup>-1</sup>                                    |
| HEAT1 (HEATER)    |                                                                                          | 350    | 1       |                                                               |
| RSTOIC            | 2 ACE → MO + H <sub>2</sub> O<br>(X=0.6)<br>ACE + MO → TMB + H <sub>2</sub> O<br>(X=0.7) | 350    | 1       | MO represented for all by-products                            |
| HEAT2 (HEATER)    |                                                                                          | 110    | 1       | cooling                                                       |
| FLASH             |                                                                                          | 85     | 1       | Separation gas-liquid                                         |
| RADFRAC           | Stages: 34<br>Feed-stage: 15<br>Distillate-to-feed: 0.291<br>Reflux ratio: 1.928         |        |         | Estimation DSTWU → 99.99 mol% TMB                             |
| <b>INPUTS LIM</b> |                                                                                          |        |         |                                                               |
| PROPERTY METHOD   | NRTL                                                                                     |        |         |                                                               |
| FEED-Streams      | Water                                                                                    | 20     | 1       | 324.310 kmol.h <sup>-1</sup>                                  |
|                   | Limonene                                                                                 | 20     | 1       | 31.162 kmol.h <sup>-1</sup>                                   |
| HEAT (HEATER)     |                                                                                          | 100    | 1       | Steam generation                                              |
| MIX1 (MIXER)      |                                                                                          |        |         | Mixing of water, Limonene, recycled Limonene from orange peel |
| RADFRAC           | Stages: 5<br>Feed-stage: 5<br>Distillate-to-feed: 0.829<br>Reflux ratio: 0.232           |        |         | Estimation DSTWU                                              |

**Table S4: Absolute values of the LCA ecological impact indicators for the cradle-to-gate production of 1 t limonene.**

| <b>Limonene</b>                                  | Ammonium Nitrate production | Irrigation | Pesticides | Energy for steam distillation | Cultivation of orange plantation | Transport | <b>total impact (sum)</b> |
|--------------------------------------------------|-----------------------------|------------|------------|-------------------------------|----------------------------------|-----------|---------------------------|
| Fossil resource scarcity/ kg oil eq              | 176                         | 63         | 105        | 468                           | 136                              | 201       | <b>1148</b>               |
| Freshwater eutrophication/ kg P eq               | 0.02                        | 0.04       | 0.05       | 2.57                          | 0.42                             | 0.34      | <b>3.40</b>               |
| Global warming potential/ kg CO <sub>2</sub> eq  | 590                         | 182        | 423        | 1904                          | 1441                             | 426       | <b>4965</b>               |
| Human carcinogenic toxicity/ kg 1,4-DCB          | 1                           | 3          | 2          | 123                           | 5                                | 184       | <b>318</b>                |
| Land use/ m <sup>2</sup> a crop eq               | 0                           | 1          | 8          | 17                            | 3784                             | 62        | <b>3872</b>               |
| Terrestrial acidification/ kg SO <sub>2</sub> eq | 20                          | 6          | 2          | 4                             | 20                               | 2         | <b>36</b>                 |
| Water depletion potential/ m <sup>3</sup>        | 9                           | 2235       | 6          | 11                            | -619                             | 4         | <b>1646</b>               |

**Table S5: Absolute values of the LCA ecological impact indicators for the cradle-to-gate production of 1 t 1,3,5-trimethyl benzene.**

| <b>TMB</b>                                          | Benzene | Propene | Energy self condensation | Process water (cooling) | Transport | <b>total impact (sum)</b> |
|-----------------------------------------------------|---------|---------|--------------------------|-------------------------|-----------|---------------------------|
| Fossil resource scarcity/<br>kg oil eq              | 1962    | 1012    | 195                      | 0                       | 87        | <b>3256</b>               |
| Freshwater eutrophication/<br>kg P eq               | 0.82    | 0       | 1.65                     | 0.02                    | 0.10      | <b>2.57</b>               |
| Global warming potential/<br>kg CO <sub>2</sub> eq  | 2567    | 1079    | 1316                     | 903                     | 407       | <b>6272</b>               |
| Human carcinogenic toxicity/<br>kg 1,4-DCB          | 49      | 0       | 73                       | 8                       | 25        | <b>326</b>                |
| Land use/<br>m <sup>2</sup> a crop eq               | 13      | 0       | 1                        | 0                       | 0         | <b>14</b>                 |
| Terrestrial acidification/<br>kg SO <sub>2</sub> eq | 8       | 2       | 2                        | 0                       | 0         | <b>12</b>                 |
| Water depletion potential/<br>m <sup>3</sup>        | 35      | 8       | 9                        | 25                      | 11        | <b>88</b>                 |
